# Supplementary material
Source: publisher site journal article supplement (https://www.dovepress.com/article/230774)
Supplement: Supplementary file 1 [file get_supplementary_file.php]

**Table S1: Mutations in *pncA* and its UFR in PZA<sup>R</sup> *M. tuberculosis* clinical isolates**

| Locus                    | Nucleotide change                      | Codon change                    | Amino acid change           | PZase activity <sup>a</sup> | No. of isolates |
|--------------------------|----------------------------------------|---------------------------------|-----------------------------|-----------------------------|-----------------|
| UFR                      | A -11G                                 | -                               | -                           | N                           | 5               |
|                          | A -11 C                                | -                               | -                           | N                           | 1               |
|                          | T-12 C                                 | -                               | -                           | N                           | 1               |
|                          | C -70 <sup>#</sup>                     | insertion                       | Frameshift                  | WP                          | 1               |
|                          | T -122                                 | deletion                        | Frameshift                  | P                           | 1               |
|                          | C -131 <sup>#</sup>                    | insertion                       | Frameshift                  | P                           | 1               |
|                          | C -114, A -11G                         | deletion + substitution         | Frameshift + substitution   | P <sup>##</sup>             | 1               |
| <i>pncA</i> +UFR         | A -17 <sup>#</sup> , G255 <sup>#</sup> | insertion                       | Frameshift                  | N                           | 1               |
|                          | C -110G, C169T                         | CAC → TAC                       | His57Tyr                    | N                           | 1               |
|                          | C-112ins, T476G                        | CTG → CGG                       | Leu159Arg                   | N                           | 2               |
|                          | G -115C, C512T                         | GCG → GTG                       | Ala171Val                   | N                           | 2               |
|                          | G -119C, T355G                         | TGG → GGG                       | Trp119 Gly <sup>#</sup>     | N                           | 1               |
|                          | A-144ins, A403C                        | ACC → CCC                       | Thr135 Pro                  | N                           | 1               |
|                          | A-144ins, A422C                        | CAG → CCG                       | Gln141 Pro                  | N                           | 2               |
|                          | T-155A, T416C                          | GTG → GCG                       | Val139Ala                   | N                           | 2               |
| <i>pncA</i> <sup>C</sup> | T2C                                    | ATG → ACG                       | Met1Thr                     | N                           | 1               |
|                          | C8A                                    | GCG → GAG                       | Ala3Glu                     | N                           | 2               |
|                          | T11G                                   | TTG → TCG                       | Leu4Ser                     | N                           | 2               |
|                          | T20G                                   | GTC → GGC                       | Val7Gly                     | N                           | 3               |
|                          | T20C                                   | GTC → GCC                       | Val7Ala <sup>#</sup>        | N                           | 2               |
|                          | CGACGTG 21-27 <sup>#</sup>             | deletion                        | Frameshift                  | N                           | 2               |
|                          | A23G                                   | GAC → GGC                       | Asp8Gly                     | N                           | 3               |
|                          | C24G, G25C, A478C                      | GAC → GAG, GTG → CTG, ACA → CCA | Asp8Glu, Val9Leu, Thr160Pro | N                           | 1               |
|                          | C28T                                   | CAG → TAG                       | Gln10Stop                   | N                           | 1               |
|                          | A29G                                   | CAG → CGG                       | Gln10Arg                    | N                           | 3               |
|                          | A29C                                   | CAG → CCG                       | Gln10Pro                    | N                           | 1               |
|                          | A35G                                   | GAC → GGC                       | Asp12Gly <sup>#</sup>       | N                           | 1               |
|                          | C51 <sup>#</sup>                       | deletion                        | Frameshift                  | N                           | 2               |
|                          | T52 <sup>#</sup>                       | deletion                        | Frameshift                  | N                           | 2               |
|                          | C52 <sup>#</sup>                       | insertion                       | Frameshift                  | N                           | 1               |
|                          | GCTGGCG 54-60 <sup>#</sup>             | insertion                       | Frameshift                  | N                           | 1               |
|                          | G71A <sup>#</sup>                      | GGC → GAC                       | Gly24Asp                    | N                           | 1               |
|                          | T80G <sup>#</sup>                      | CTG → CGG                       | Leu27Arg                    | N                           | 3               |
|                          | C83A                                   | GCC → GAC                       | Ala28Asp                    | N                           | 2               |
|                          | T104C                                  | CTG → CCG                       | Leu35Pro                    | N                           | 1               |
|                          | A128 <sup>#</sup>                      | deletion                        | Frameshift                  | N                           | 2               |
|                          | G133T <sup>#</sup>                     | GTG → TTG                       | Val45Leu                    | N                           | 3               |
|                          | C137A                                  | GCA → GAA                       | Ala46Glu                    | N                           | 3               |
|                          | A142T <sup>#</sup>                     | AAG → TAG                       | Lys48Stop                   | N                           | 1               |
|                          | A143G                                  | AAG → AGG                       | Lys48Arg                    | N                           | 2               |
|                          | A146G                                  | GAC → GGC                       | Asp49Gly                    | N                           | 2               |
|                          | A152G                                  | CAC → CGC                       | His51Arg                    | N                           | 1               |
|                          | A152C                                  | CAC → CCC                       | His51Pro                    | N                           | 1               |
|                          | C161T                                  | CCG → CTG                       | Pro54Leu                    | N                           | 3               |
|                          | C161A                                  | CCG → CAG                       | Pro54 Gln <sup>#</sup>      | N                           | 1               |
|                          | G162A                                  | CCG → CCA                       | Pro54Pro                    | P                           | 2               |
|                          | G162                                   | deletion                        | Frameshift                  | N                           | 2               |
|                          | T165 <sup>#</sup>                      | deletion                        | Frameshift                  | N                           | 3               |
|                          | A170C                                  | CAC → CCC                       | His57Pro                    | N                           | 2               |
|                          | T173C                                  | TTC → TCC                       | Phe58Ser                    | N                           | 2               |
|                          | ACACCGGACT 181-190 <sup>#</sup>        | deletion                        | Frameshift                  | N                           | 2               |
|                          | C185T                                  | CCG → CTG                       | Pro62Leu                    | N                           | 2               |
|                          | C189A                                  | GAC → GAA                       | Asp63Glu                    | N                           | 3               |
|                          | T196C                                  | TCG → CCG                       | Ser66Pro                    | N                           | 2               |
|                          | T199C                                  | TCG → CCG                       | Ser67Pro                    | N                           | 2               |
|                          | A212G                                  | CAT → CGT                       | His71Arg                    | N                           | 3               |
|                          | A226C                                  | ACT → CCT                       | Thr76 Pro                   | N                           | 3               |
| G233A                    | GGC → GAC                              | Gly78Asp                        | N                           | 2                           |                 |
| T246 <sup>#</sup>        | deletion                               | Frameshift                      | N                           | 1                           |                 |

|                                |           |                        |    |   |
|--------------------------------|-----------|------------------------|----|---|
| T254G                          | CTG → CGG | Leu85Arg               | N  | 2 |
| T254C                          | CTG → CCG | Leu85Pro               | N  | 3 |
| C263A                          | TCG → TAG | Ser88Stop              | N  | 2 |
| T269G                          | ATC → AGC | ile90Ser               | N  | 3 |
| G279 <sup>#</sup>              | insertion | Frameshift             | N  | 2 |
| T281G <sup>#</sup>             | TTC → TGC | Phe94Cys               | N  | 2 |
| C282G <sup>#</sup>             | TTC → TTG | Phe94Leu               | N  | 2 |
| A286G                          | AAG → GAG | Lys96Glu               | N  | 2 |
| A287G                          | AAG → AGG | Lys96Arg               | N  | 1 |
| G290A                          | GGT → GAT | Gly97Asp               | N  | 4 |
| A296 <sup>#</sup>              | deletion  | Frameshift             | N  | 1 |
| A298C <sup>#</sup>             | ACC → CCC | Thr100Pro              | N  | 3 |
| C299T <sup>#</sup>             | ACC → ATC | Thr100Ile              | N  | 2 |
| G304C                          | GCG → CCG | Ala102Pro <sup>#</sup> | N  | 2 |
| T307C                          | TAC → CAC | Tyr103His              | N  | 1 |
| C309A                          | TAC → TAA | Tyr103Stop             | N  | 3 |
| C309G                          | TAC → TAG | Tyr103Stop             | N  | 3 |
| G311T <sup>#</sup>             | AGC → ATC | Ser104Ile              | N  | 3 |
| C312A                          | AGC → AGA | Ser104Arg              | N  | 2 |
| G313T <sup>#</sup>             | GGC → TGC | Gly105Cys              | N  | 2 |
| G313 <sup>#</sup>              | insertion | Frameshift             | N  | 2 |
| G314A                          | GGC → GAC | Gly105Asp              | N  | 1 |
| CTTCGAAGGAGTCGA                |           |                        |    |   |
| 314-329 <sup>#</sup>           | insertion | Frameshift             | N  | 2 |
| A320 <sup>#</sup>              | deletion  | Frameshift             | N  | 2 |
| A340C                          | ACG → CCG | Thr114Pro              | N  | 2 |
| G356A <sup>#</sup>             | TGG → TAG | Trp119Stop             | N  | 2 |
| T359C                          | CTG → CGG | Leu120Pro              | N  | 2 |
| A365, A366 <sup>#</sup>        | deletion  | Frameshift             | N  | 3 |
| T383, G546 <sup>#</sup>        | insertion | Frameshift             | N  | 1 |
| TGTGGTCGG 387-395 <sup>#</sup> | deletion  | Frameshift             | N  | 2 |
| GGTCG 389-394 <sup>#</sup>     | deletion  | Frameshift             | N  | 2 |
| G390                           | insertion | Frameshift             | N  | 3 |
| G391                           | insertion | Frameshift             | N  | 2 |
| G395A                          | GGT → GAT | Gly132Asp              | N  | 2 |
| T396, T397 <sup>#</sup>        | deletion  | Frameshift             | N  | 1 |
| A407G                          | GAT → GGT | Asp136Gly              | N  | 4 |
| T408 <sup>#</sup>              | insertion | Frameshift             | N  | 2 |
| G415C                          | GTG → CTG | Val139Leu              | N  | 2 |
| T416G                          | GTG → GGG | Val139Gly              | N  | 3 |
| T416C                          | GTG → GCG | Val139Ala              | N  | 3 |
| C421T                          | CAG → TAG | Gln141Stop             | N  | 1 |
| A424C                          | ACG → CCG | Thr142Pro              | N  | 3 |
| A424G                          | ACG → GCG | Thr142Ala              | N  | 2 |
| C425T                          | ACG → ATG | Thr142Met              | N  | 4 |
| C437T                          | GCG → GTG | Ala146Val              | N  | 2 |
| TTGGCCACCAGGGTG                |           |                        |    |   |
| 451-465 <sup>#</sup>           | deletion  | Frameshift             | N  | 3 |
| T452C <sup>#</sup>             | TTG → TCG | Leu151Ser              | N  | 2 |
| C455 <sup>#</sup>              | deletion  | Frameshift             | P  | 1 |
| G461 <sup>#</sup>              | insertion | Frameshift             | WP | 2 |
| GTGGACCTGACA 469-              |           |                        |    |   |
| 480 <sup>#</sup>               | deletion  | Frameshift             | N  | 1 |
| G483                           | insertion | Frameshift             | N  | 2 |
| G485A                          | GGT → GAT | Gly162Asp              | N  | 1 |
| T490C                          | TCG → CCG | Ser164Pro              | N  | 1 |
| C494 <sup>#</sup>              | deletion  | Frameshift             | N  | 2 |
| CGCCAGCGTCGA 531-              |           |                        |    |   |
| 542 <sup>#</sup>               | deletion  | Frameshift             | N  | 1 |
| T545G                          | TTG → TGG | Leu182Trp <sup>#</sup> | N  | 2 |
| T545C                          | TTG → TCG | Leu182Ser              | N  | 1 |

UFR: mutations only in upstream flanking region (UFR) of *pncA*. *pncA*+UFR: mutations both in UFR and *pncA*..  
*pncA*<sup>C</sup>: mutations only in the coding region of *pncA*. <sup>a</sup> P: positive, N: negative, WP: Weakly positive, ins:  
insertion; del, deletion. P<sup>##</sup>: novel phenomena first-time in this study. <sup>#</sup> indicates the novel mutations in PZA<sup>R</sup> strains  
in this study.

**Table S2: Results of sequencing analysis of *rpsA*, *panD*, *Rv2783c* and *Rv2044c-pncA-Rv2042c* in PZA<sup>R</sup> isolates**

| Genes          | Nucleotide position | Codon change                 | Amino acid change                                                     | PZase activity <sup>a</sup> | No. of isolates |
|----------------|---------------------|------------------------------|-----------------------------------------------------------------------|-----------------------------|-----------------|
| <i>Rv2044c</i> | T208C, T212A, T238G | TAC→ CAC, ATC→ AAC, TGG→ GGG | Tyr70His <sup>#</sup> , Ile71Asn <sup>#</sup> , Trp80Gly <sup>#</sup> | N                           | 1               |
|                | G239T, C245A        | TGG→ TTG, GCC→ GAC           | Trp80Leu <sup>#</sup> , Ala82Asp <sup>#</sup>                         | N                           | 1               |
| <i>rpsA</i>    | A485G               | CAG → CGG                    | Gln162Arg <sup>#</sup>                                                | P                           | 3               |
|                | C1235T              | GCC→ GTC                     | Ala412Val <sup>#</sup>                                                | P                           | 2               |
|                | C86T                | ACG→ ATG                     | Thr29Met                                                              | P                           | 2               |
| <i>panD</i>    | T395C               | Leu→ Pro                     | Leu132 Pro <sup>#</sup>                                               | P                           | 2               |
|                | C400T               | Pro→ Ser                     | Pro134Ser                                                             | P                           | 2               |
| <i>Rv2783c</i> | T445C, C1893T       | TCC→ CCC, ATC→ ATT           | Ser149Pro <sup>#</sup> , Ile631Ile                                    | P                           | 1               |
|                | G444T, T445C        | GCG→ GCT, TCC→ CCC           | Ala148Ala, Ser149Pro <sup>#</sup>                                     | P                           | 2               |

<sup>a</sup> Negative (N), Positive (P). <sup>#</sup> indicates the novel mutations in *Rv2044c*, *rpsA*, *panD* and *Rv2783c* genes.

*rpsA* gene frequently showed A636C, Arg→Arg synonymous mutation in both PZA<sup>S</sup> and PZA<sup>R</sup> strains.

\*Note: All 448 tested *M. tuberculosis* strains had WT *clpC1* without any mutation in coding or its upstream region.

**Table S3: Mutations distribution in PZA<sup>S</sup> *M. tuberculosis* clinical isolates**

| <i>pncA</i>       |              |                   | <i>rpsA</i> | <i>panD</i> | <i>Rv2783c</i> | <i>clpC1</i> | PZase activity | No. of isolates |
|-------------------|--------------|-------------------|-------------|-------------|----------------|--------------|----------------|-----------------|
| Nucleotide change | Codon change | Amino acid change |             |             |                |              |                | n = 179         |
| T92G              | ATC → AGC    | Ile 31 Ser        | WT          | WT          | WT             | WT           | P              | 2               |
| A139G             | ACC → GCC    | Thr 47Ala         | WT          | WT          | WT             | WT           | P              | 1               |
| A159              | insertion    | Frameshift        | WT          | WT          | WT             | WT           | P              | 1               |
| T213C             | CAT → CAC    | His 71 His        | WT          | WT          | WT             | WT           | P              | 1               |
| C428T             | GCC → GTC    | Ala 143 Val       | WT          | WT          | WT             | WT           | P              | 1               |
| A446G             | AAT → AGT    | Asn 149 Ser       | WT          | WT          | WT             | WT           | P              | 1               |
| G477A             | CTG → CTA    | Leu 159 Leu       | WT          | WT          | WT             | WT           | P              | 1               |
| T488C             | GTG → GCG    | Val 163 Ala       | WT          | WT          | WT             | WT           | P              | 1               |
| G513T             | GCG → GCT    | Ala 171 Ala       | WT          | WT          | WT             | WT           | P              | 1               |
| WT                | WT           | WT                | WT          | WT          | WT             | WT           | P              | 169             |

\* PZase = Pyrazinamidase ; P = Positive ; WT = Wild-type
